# Supplementary material for: Effect of Different Solvents on Morphology and Gas-Sensitive Properties of Grinding-Assisted Liquid-Phase-Exfoliated MoS2 Nanosheets
Source: MDPI journal article supplement (doi:10.3390/nano12244485), 2022-12-18
Supplement: s1 [file s1]

## Supplementary Information

# Effect of Different Solvents on Morphology and Gas-Sensitive Properties of Grinding-Assisted Liquid Phase-Exfoliated MoS<sub>2</sub> Nanosheets

Hao Wang <sup>1,2</sup>, Xiaojie Xu <sup>1,2</sup> and Talgar Shaymurat <sup>1,2,\*</sup>

<sup>1</sup> Key Laboratory of New Energy and Materials Research, Xinjiang Institute of Engineering, Urumqi 830023, China

<sup>2</sup> Xinjiang Condensed Matter Phase Transition and Microstructure Laboratory, College of Physics Science and Technology, Yili Normal University, Yining 835000, China

\*Correspondence: talgar.shaymurat@vip.163.com

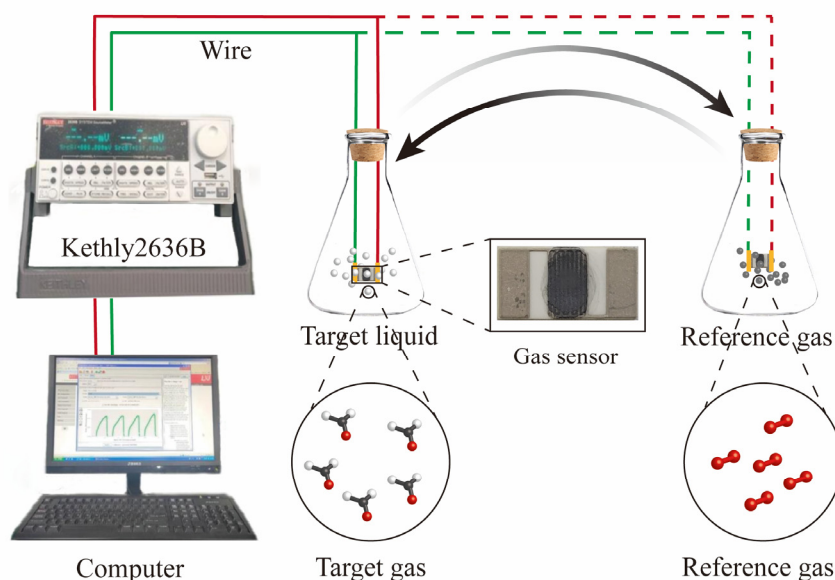

Figure S1. Schematic of sensing test system.

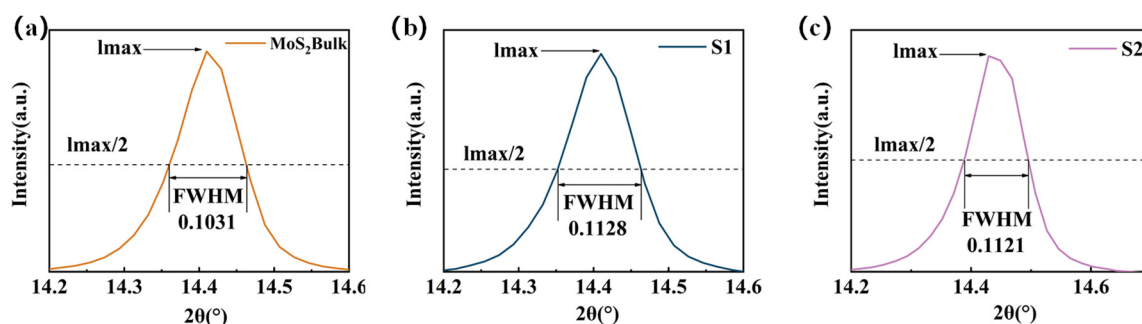

Figure S2. The FWHM of XRD peak of the bulk MoS<sub>2</sub>, S1 and S2 from Figure 1. The FWHM of bulk MoS<sub>2</sub>, S1 and S2 are 0.131°, 0.1128°, 0.112°, respectively.
